# Supplementary material for: Ion migration drives self-passivation in perovskite solar cells and is enhanced by light soaking
Source: Royal Society of Chemistry journal article supplement (doi:10.1039/d1ra01166a), 2021-01-01
Supplement: d1ra01166a1.pdf [file d1ra01166a1.pdf]

## Supporting Information

### Ion Migration Drives Self-Passivation in Perovskite Solar Cells and is Enhanced by Light Soaking

Bart Roose<sup>1</sup>

<sup>1</sup> Department of Physics, Cavendish Laboratory, University of Cambridge, 19 JJ Thomson Avenue, Cambridge, CB3 0HE, UK

**S1. Device parameters of perovskite solar cells with varying halide ratio and aging conditions. Hysteresis index is defined as  $(PCE_{\text{backwards}} - PCE_{\text{forwards}}) / (PCE_{\text{backwards}} + PCE_{\text{forwards}})$ . Averages of 10 devices.**

| Iodide ratio | Condition | V <sub>oc</sub> (mV) | J <sub>sc</sub> (mA/cm <sup>2</sup> ) | FF (%)  | PCE (%)    | Hysteresis index |
|--------------|-----------|----------------------|---------------------------------------|---------|------------|------------------|
| <b>1</b>     | fresh     | 949 ± 6              | 25.0 ± 0.6                            | 78 ± 2  | 19.1 ± 0.4 | 0.12 ± 0.03      |
|              | aged      | 942 ± 17             | 24.2 ± 1.3                            | 62 ± 6  | 14.1 ± 1.8 | 0.02 ± 0.02      |
|              | soaked    | 1035 ± 6             | 25.4 ± 0.6                            | 75 ± 2  | 19.8 ± 1.1 | 0.02 ± 0.02      |
| <b>0.83</b>  | fresh     | 1023 ± 16            | 21.3 ± 0.6                            | 68 ± 3  | 15.5 ± 0.9 | 0.12 ± 0.03      |
|              | aged      | 1064 ± 5             | 21.0 ± 0.4                            | 73 ± 3  | 16.4 ± 0.7 | 0.01 ± 0.02      |
|              | soaked    | 1096 ± 13            | 21.4 ± 1.1                            | 73 ± 2  | 17.1 ± 1.3 | 0.01 ± 0.02      |
| <b>0.67</b>  | fresh     | 1067 ± 18            | 18.0 ± 0.5                            | 65 ± 2  | 13.0 ± 0.8 | 0.08 ± 0.01      |
|              | aged      | 842 ± 201            | 18.7 ± 0.6                            | 44 ± 10 | 7.0 ± 2.7  | 0.01 ± 0.01      |
|              | soaked    | 1133 ± 14            | 18.3 ± 1.1                            | 70 ± 3  | 14.5 ± 1.2 | 0.02 ± 0.03      |

**S2. Device parameters of perovskite solar cells directly before and after 10 minutes of light soaking.**

| Condition   | V <sub>oc</sub> (mV) | J <sub>sc</sub> (mA/cm <sup>2</sup> ) | FF (%) | PCE (%)    |
|-------------|----------------------|---------------------------------------|--------|------------|
| before soak | 1007 ± 18            | 21.9 ± 0.1                            | 76 ± 1 | 16.8 ± 0.5 |
| after soak  | 1012 ± 24            | 21.7 ± 0.1                            | 76 ± 2 | 16.7 ± 0.7 |

**S3. SEM images of  $\text{Cs}_{0.05}(\text{MA}_{0.17}\text{FA}_{0.83})_{0.95}\text{Pb}(\text{I}_x\text{Br}_{1-x})_3$  perovskite films ( $x=1.00, 0.83$  and  $0.67$ ), just after fabrication (fresh), after aging for 7 days in dark and dry conditions (aged) and after aging following a ten-minute light soaking treatment (soaked). Scale bar is 400 nm.**

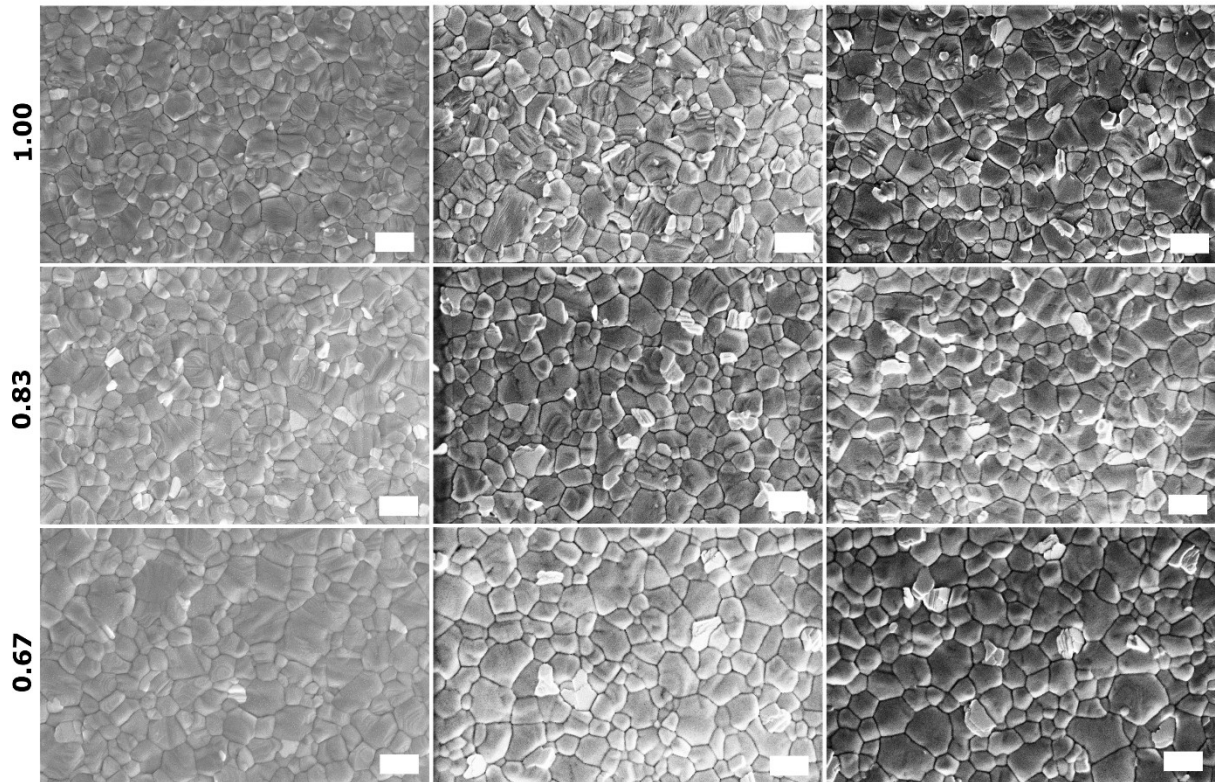

S4. X-ray diffractograms of  $\text{Cs}_{0.05}(\text{MA}_{0.17}\text{FA}_{0.83})_{0.95}\text{Pb}(\text{I}_x\text{Br}_{1-x})_3$  perovskite films ( $x=1.00$ ,  $0.83$  and  $0.67$ ), just after fabrication (fresh), after aging for 7 days in dark and dry conditions (aged) and after aging following a ten-minute light soaking treatment (soaked). Peaks labeled with a star stem from the FTO substrate.

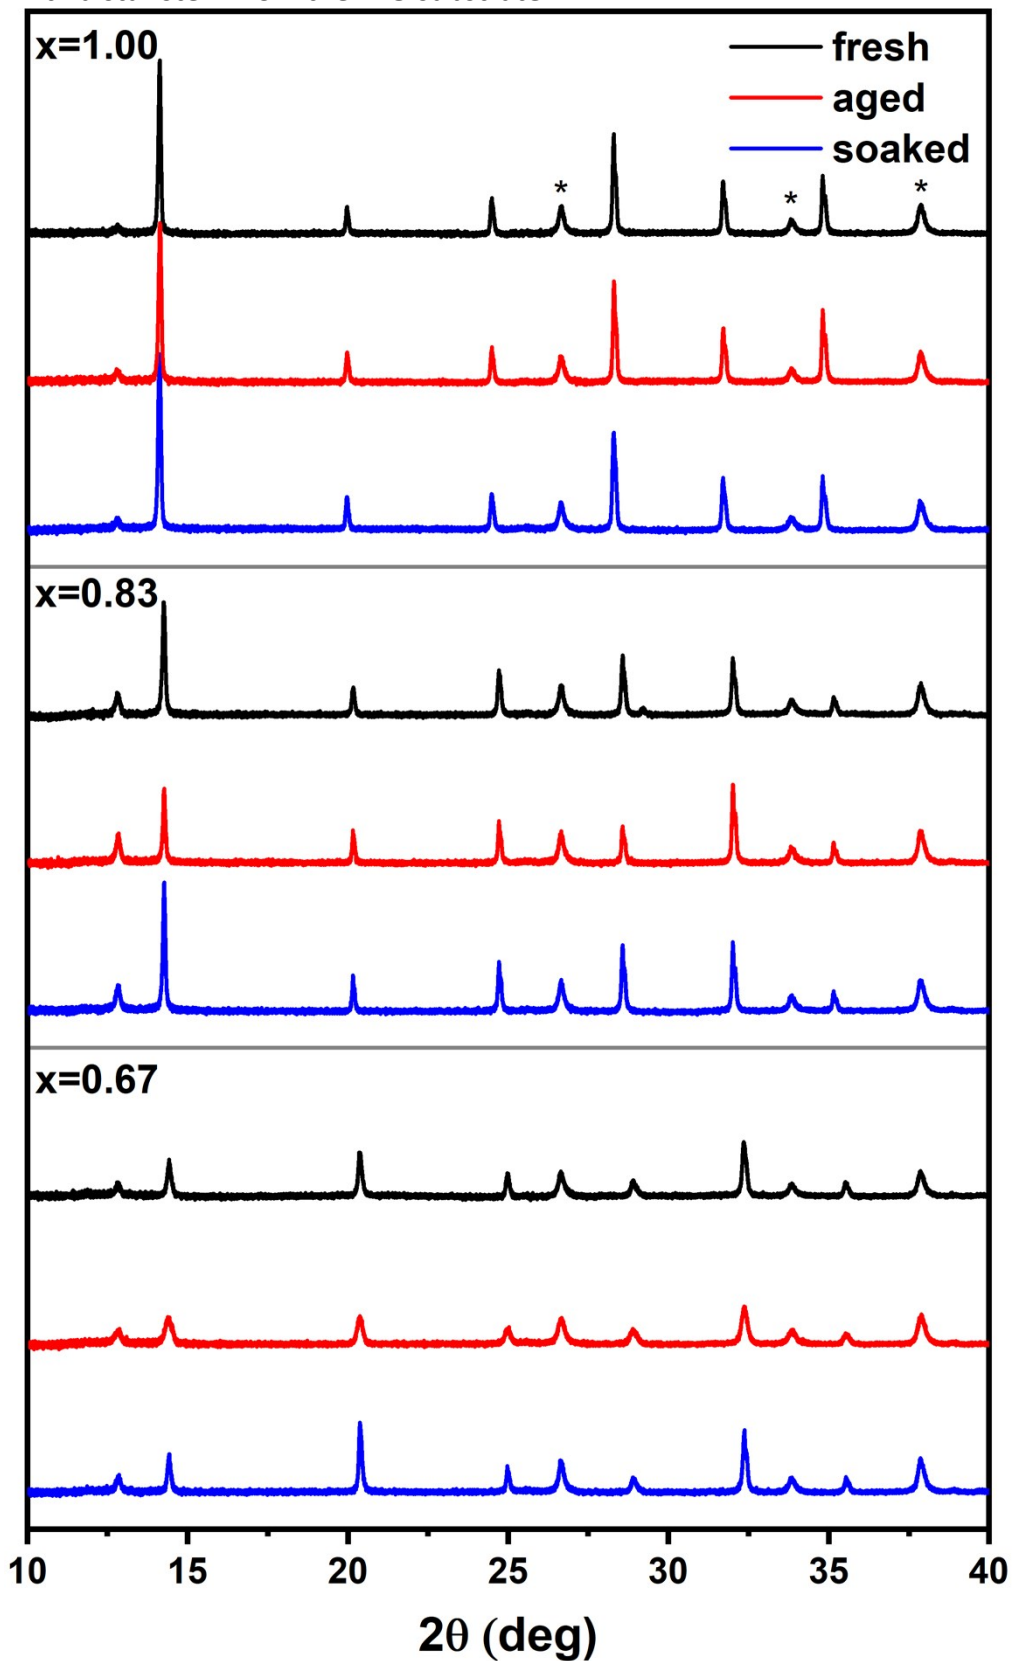

S5. Williamson-Hall analysis of  $\text{Cs}_{0.05}(\text{MA}_{0.17}\text{FA}_{0.83})_{0.95}\text{Pb}(\text{I}_x\text{Br}_{1-x})_3$  perovskite films ( $x=1.00$ ,  $0.83$  and  $0.67$ ), just after fabrication (fresh), after aging for 7 days in dark and dry conditions (aged) and after aging following a ten-minute light soaking treatment (soaked) and corresponding strain values ( $C\epsilon$ ).

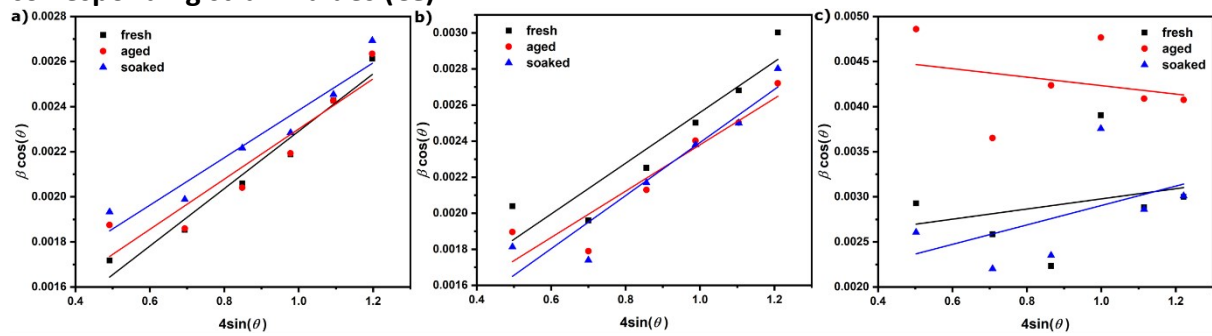

| Iodide ratio | Condition | $C\epsilon$ ( $10^{-3}$ ) |
|--------------|-----------|---------------------------|
| <b>1</b>     | fresh     | $1.3 \pm 0.1$             |
|              | aged      | $1.1 \pm 0.2$             |
|              | soaked    | $1.1 \pm 0.2$             |
| <b>0.83</b>  | fresh     | $1.4 \pm 0.3$             |
|              | aged      | $1.3 \pm 0.2$             |
|              | soaked    | $1.5 \pm 0.3$             |
| <b>0.67</b>  | fresh     | $0.6 \pm 1.0$             |
|              | aged      | $-0.5 \pm 0.8$            |
|              | soaked    | $1.1 \pm 0.9$             |
